# Supplementary material
Source: PubMed Central journal article supplement (PMC3664849)
Supplement: c806719193bbc98a69dadd1002137db8_genetics.113.149740-11.pdf [file c806719193bbc98a69dadd1002137db8_genetics.113.149740-11.pdf]

**A**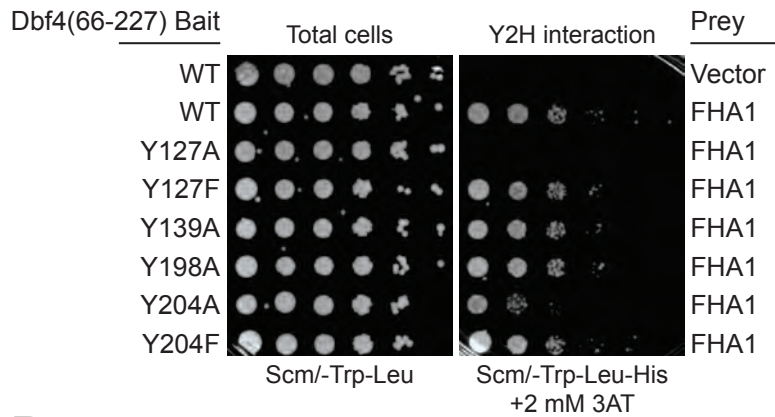**B**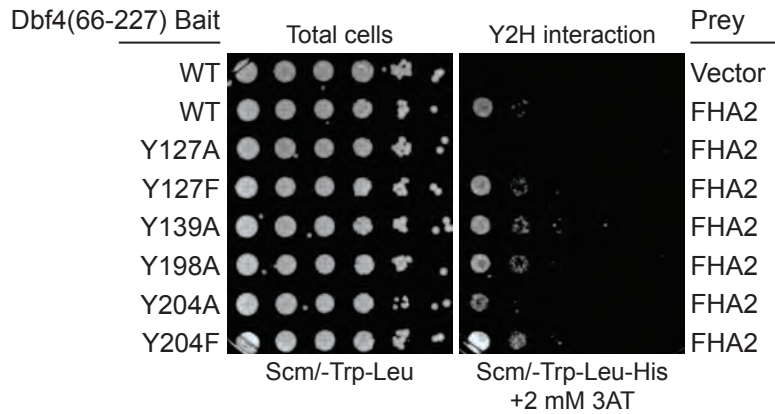**C**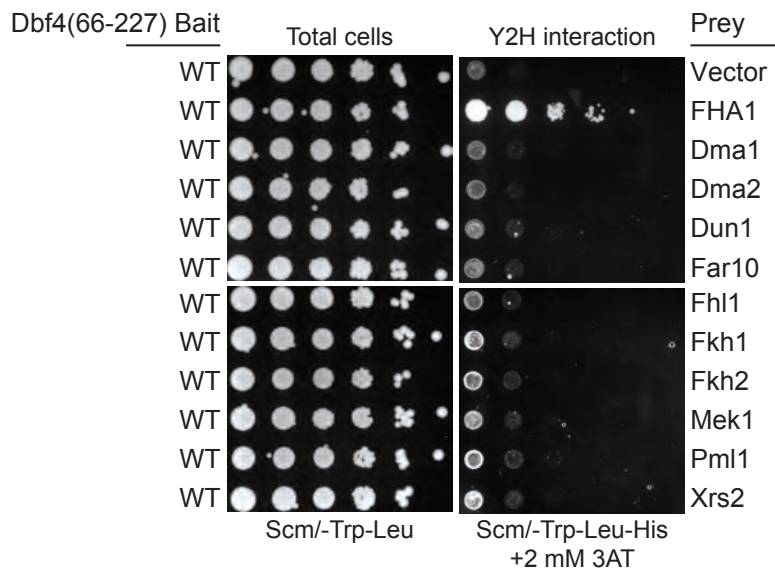

**Figure S1** Analysis of FHA domain-Dbf4 interactions including a screen of all Y residues in Dbf4 residues 100-227. (A and B) The indicated Dbf4 tyrosine mutants were assayed for a two-hybrid interaction with the Rad53 FHA1 (A) and FHA2 (B) domains. Although Y127A and Y204A mutants eliminate the binding of both FHA domains, there is no loss of binding by substituting the structurally similar but non-phosphorylatable amino acid, phenylalanine (Y127F and Y204F). (C) Two hybrid interaction data of the Dbf4 N-terminus (66-227) with all remaining FHA domains in the yeast genome. Dma1 (pJK135, 137-302aa) (DUROCHER and JACKSON 2002), Dma2 (pJK137, 246-408aa) (DUROCHER and JACKSON 2002), Dun1 (pJK275, 1-160aa) (HAMMET *et al.* 2000), Far10 (pJK277, 61-227aa) (DUROCHER and JACKSON 2002), Fhl1 (pJK279, 253-400aa) (WADE *et al.* 2004), Fkh1 (pJK281, 41-185aa) (DUROCHER and JACKSON 2002), Fkh2 (pJK287, 1-254aa) (DARIEVA *et al.* 2003), Mek1 (pJK283, 1-152aa) (DUROCHER and JACKSON 2002), Pml1 (pJK289, 54-204) (BROOKS *et al.* 2009), Xrs2 (pJK285, 1-125aa) (PALMBOS *et al.* 2008).

**A**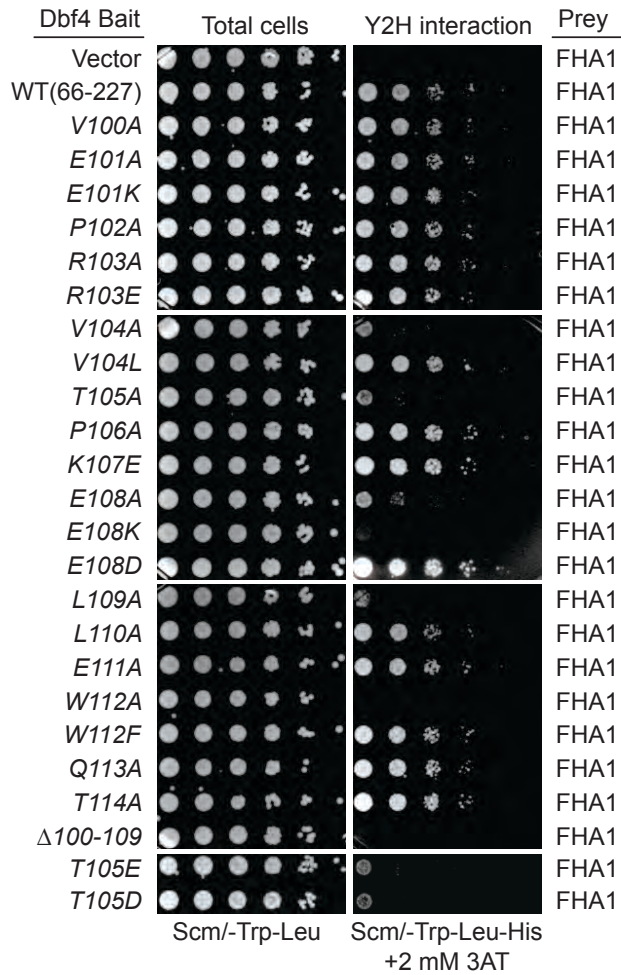**B**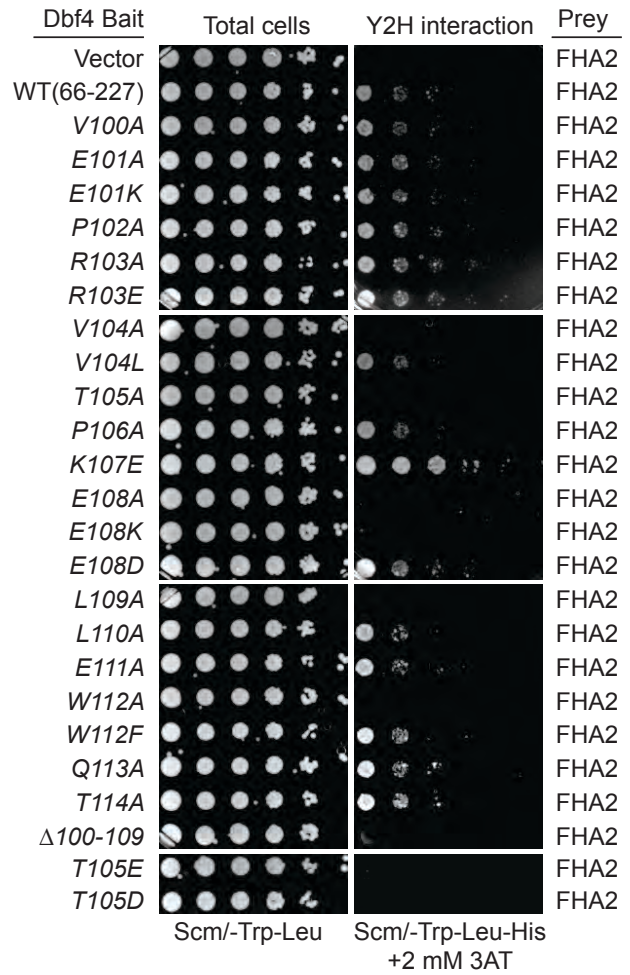

**Figure S2** Dbf4 residues V104, T105, E108, L109, and W112 were required for binding the Rad53 FHA domains. The indicated substitutions within residues 100-114 of the Dbf4 Nterminal (66-227) bait plasmid were assayed for a two-hybrid interaction with the Rad53 FHA1 (panel A) and FHA2 domains (panel B). Spotting as in Figure S1.

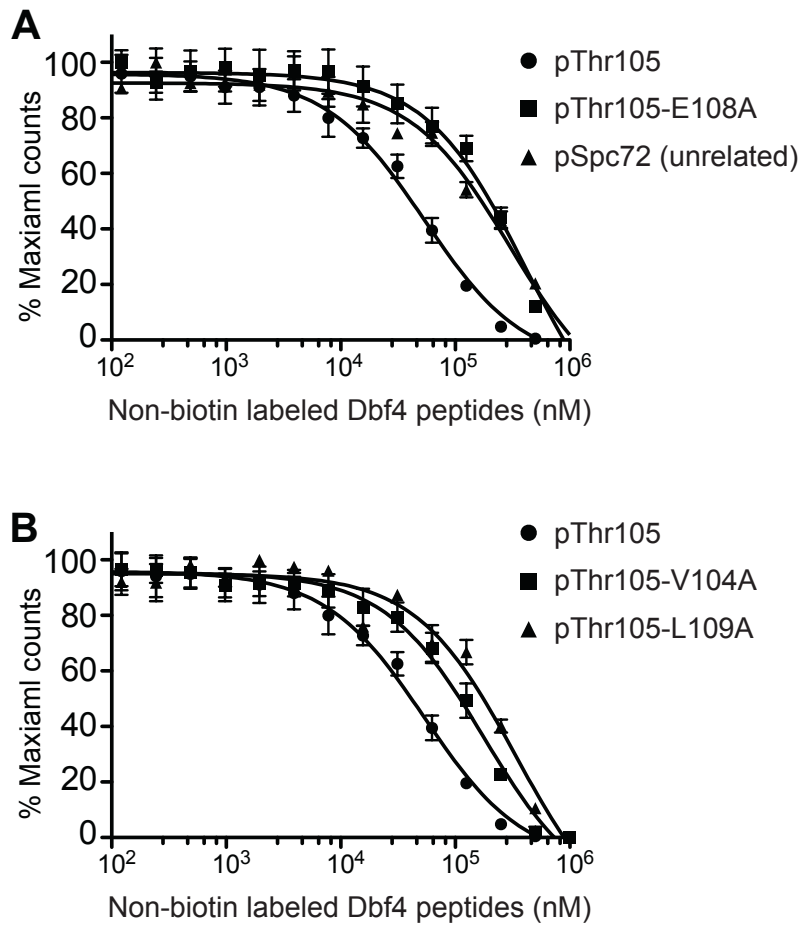

**Figure S3** Dbf4 residues V104, E108, and L109 were critical for binding the Rad53 FHA domains. (A) The Dbf4 biotinylated peptide pThr105-FHA1 interaction was competed by the non-biotinylated T105-phosphorylated Dbf4 peptides (pThr105), but not by the same Dbf4 peptide with an E108A substitution, or by an unrelated phospho-serine peptide (pSpc72). (B) The pThr105-V104A and pThr105-L109A peptides were also defective in competing the biotinylated pThr105-FHA1 interaction.

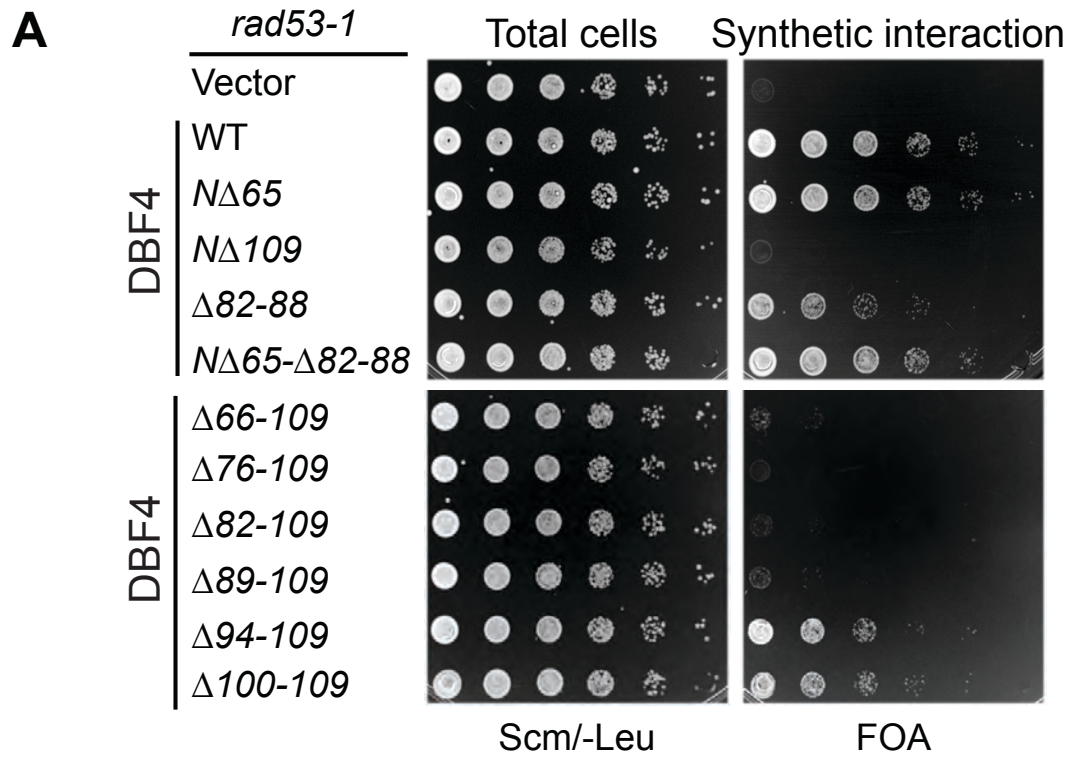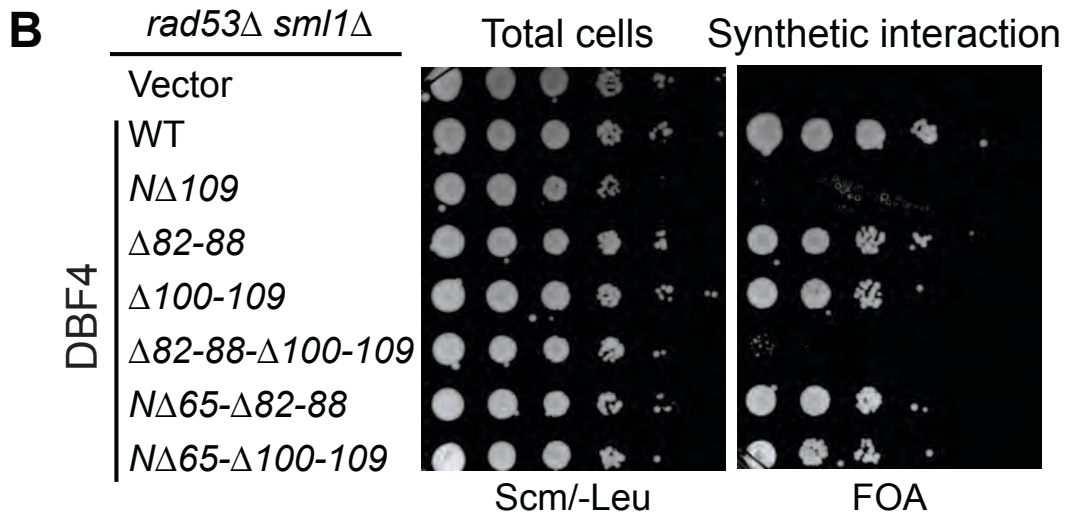

**Figure S4** The synthetic lethality between *dbf4-NΔ109* and *rad53-1* or *rad53Δ* was not due to either loss of Cdc5 interaction or increased Dbf4 stability, but requires sequences between residues 82-109. Wild type and various *dbf4* mutants were cloned in low-copy number (*ARS/CEN/LEU2*) vectors, driven by the *DBF4* endogenous promoter. Plasmids were transformed into M1589 (*rad53-1 dbf4Δ::kanMX6 [pDBF4-URA3]*) or M3581 (*rad53Δ::TRP1 sml1Δ::HIS3 dbf4Δ::kanMX6 [pDBF4-URA3]*) and the wild-type *DBF4-URA3* plasmids were selected against on FOA. Cells that could not grow on FOA plates were scored as having a synthetic lethal interaction. The NΔ65 deletion causes increased Dbf4 stability by deleting sequences important for ubiquitin-mediated proteolysis. The Δ82-88 deletion prevented the Cdc5 interaction with Dbf4, while the Δ100-109 deletion prevented the interaction with Rad53 (see Figure S6).

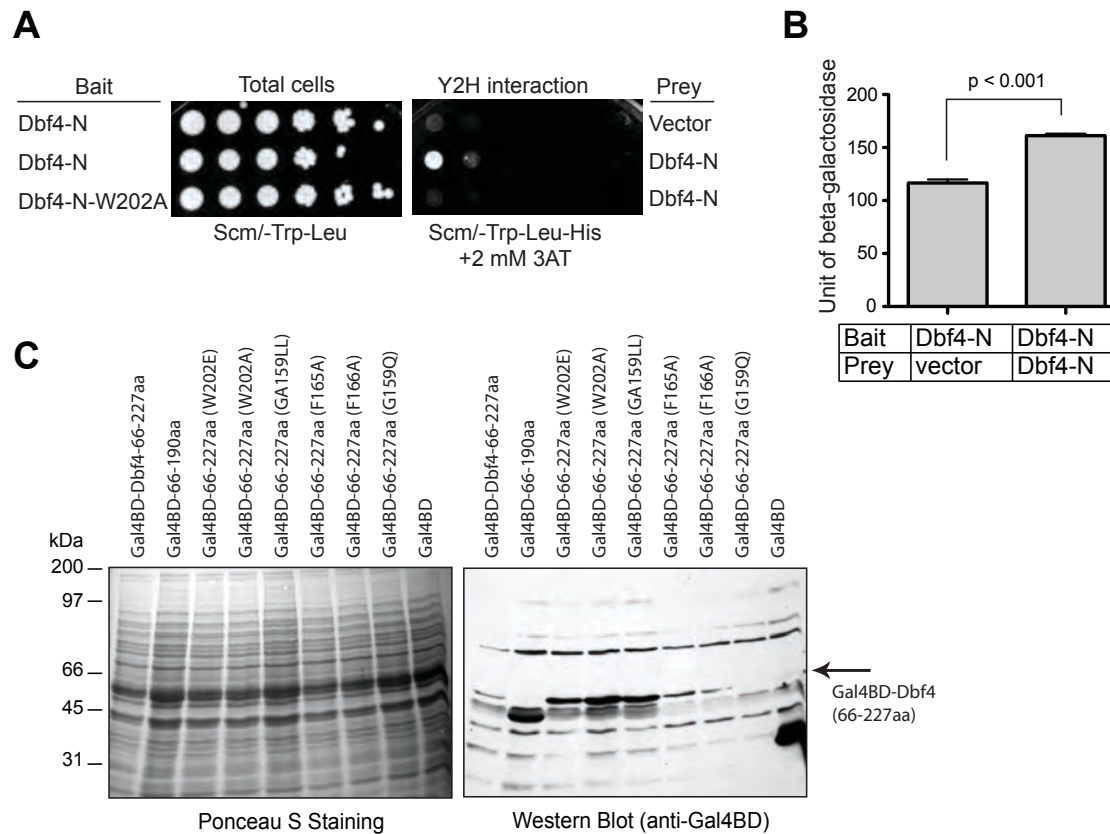

**Figure S5** Evidence for a Dbf4-Dbf4 N-terminal interaction. (A-B) Dbf4 N-terminal residues 66-227 were cloned in two-hybrid bait and prey plasmids separately to examine Dbf4 dimerization. Two-hybrid interactions were quantitated by spotting assays on selective media (panel A) or by  $\beta$ -galactosidase assays (panel B). (C) The expression of representative Dbf4 mutants in two-hybrid assays is shown by Western blotting against the c-Myc epitope tag on the Gal4BD (DNA Binding Domain) fusions. Whole cell extracts prepared by TCA extraction method were equally loaded onto each lane (Ponceau S staining, left). Gal4BD fused Dbf4 were detected by anti-Myc antibody (9E10), followed by anti-mouse second antibody (right).

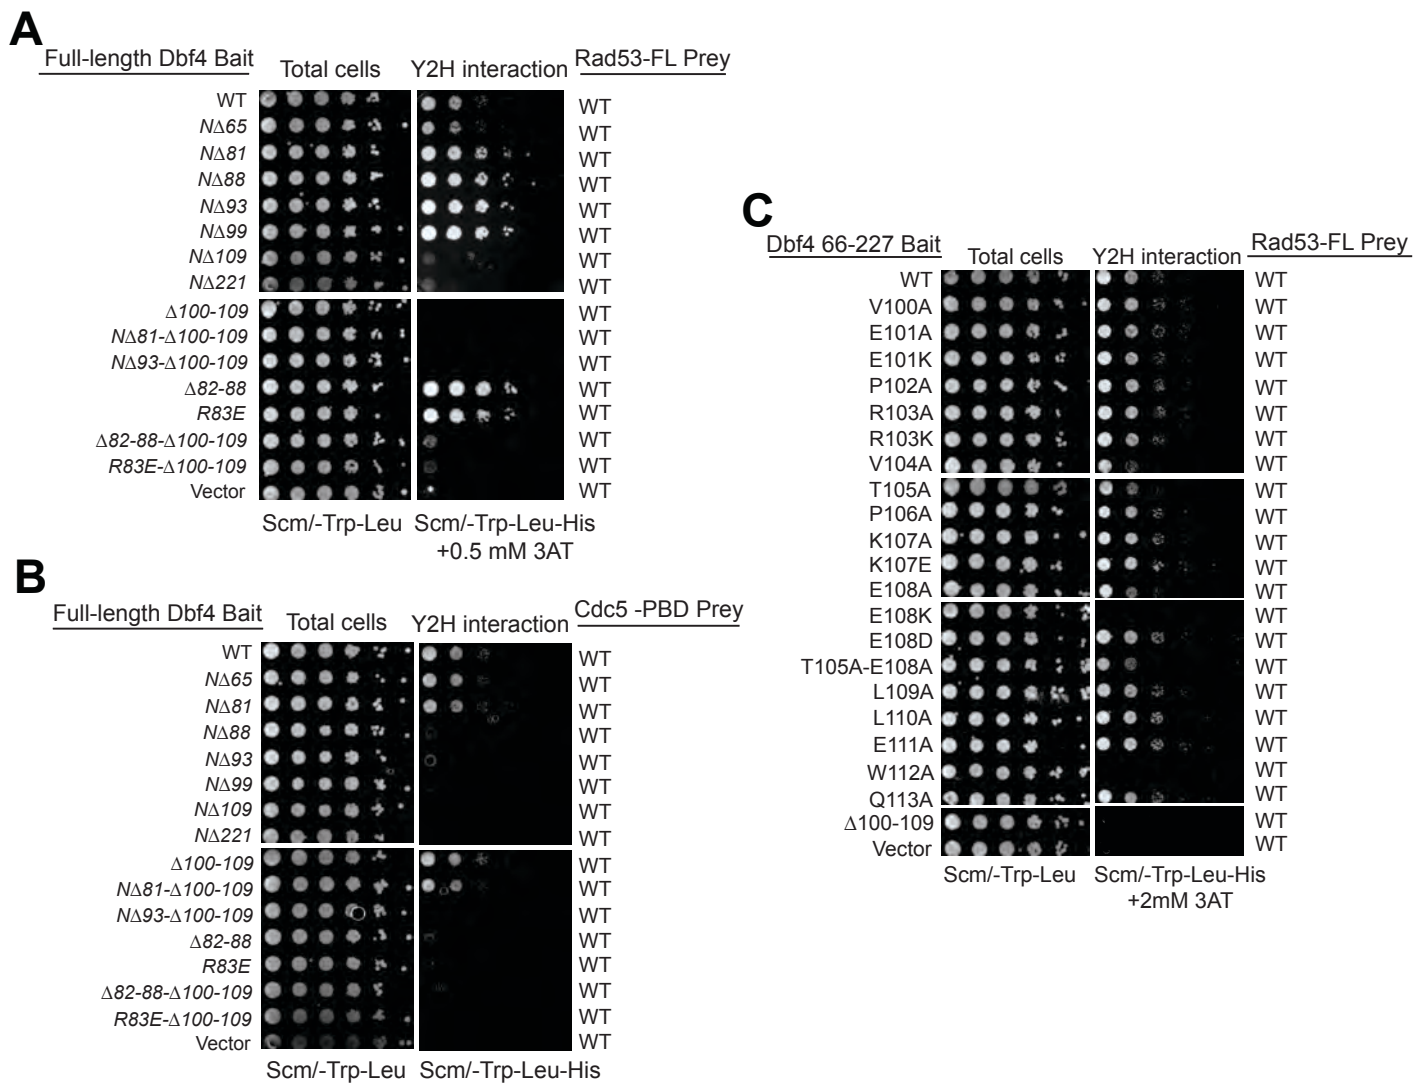

**Figure S6** Dbf4 sequences important for binding full length Rad53 and the Cdc5 PBD. (A) A series of deletion in full-length Dbf4 was assayed by two-hybrid for interaction with full length Rad53 (panel A) or with the Cdc5 Polo-box domain (PBD) (panel B). The *dbf4-Δ100-109* deletion caused a loss of Rad53 binding, but still allowed interaction with the Cdc5-PBD. The *dbf4-Δ82-88* deletion caused loss of Cdc5 binding but not Rad53. An N-terminal deletion through residue 81 (NΔ81) or disruption of the Cdc5 binding site (Δ82-88 and R83E) caused increased Rad53 binding compared to full length Dbf4. (C) Dbf4 point mutations were assayed for their two-hybrid interaction against full length Rad53. The Δ100-109 deletion caused a loss of the two-hybrid signal similar to the vector control. The V104A, T105A, E108A mutations resulted in a diminished Rad53 interaction.



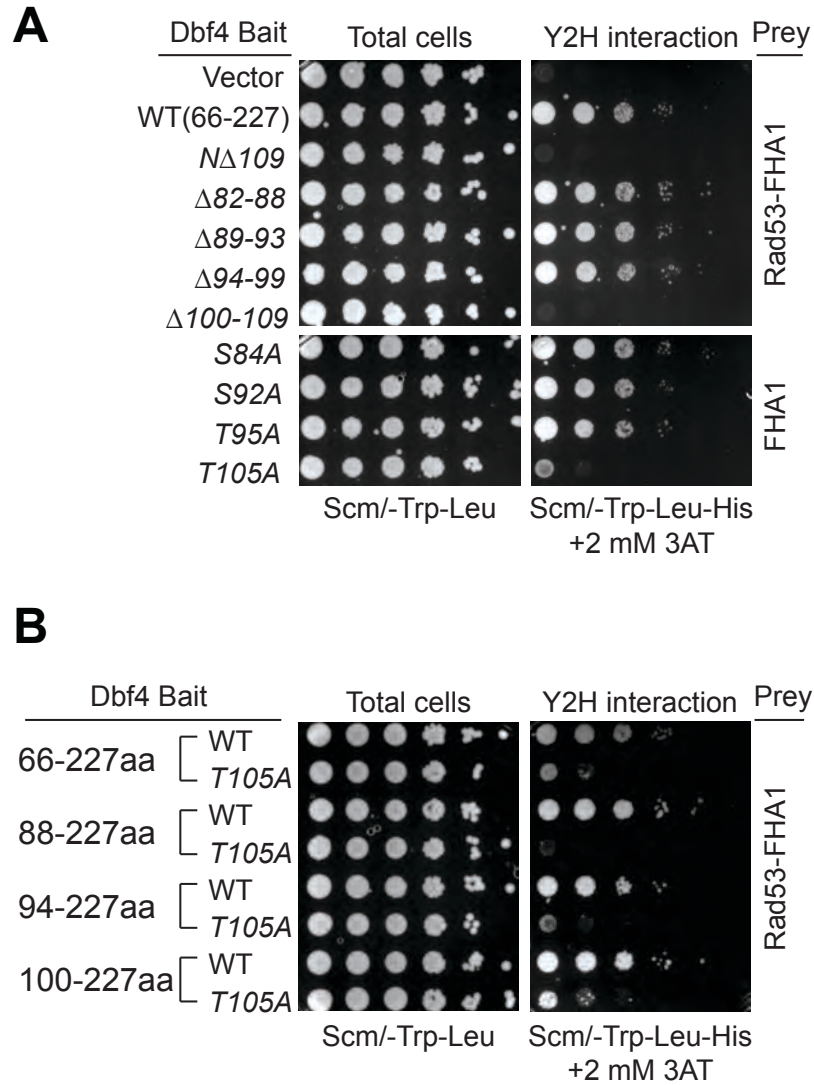

**Figure S7** Dbf4 T105 residue was critical for the Dbf4-FHA1 domain interaction. (A) The *dbf4*-Δ100-109, *dbf4*-T105A and *dbf4*-NΔ109 mutants caused a loss of FHA1 domain binding in two-hybrid assays. The *dbf4*-S84A, -S92A, and -T95A mutants did not show any effect on FHA1 domain binding. (B) Substitution of T105A within various Dbf4 truncations consistently caused a loss of interaction with the FHA1 domain.

**Table S1 Plasmids used in this study**

| <b>Plasmid</b> | <b>Description</b>                             | <b>Source</b>                |
|----------------|------------------------------------------------|------------------------------|
| p4339          | pCRII-TOPO::natRMX4                            | Goldstein and McCusker, 1999 |
| pAcSG2         |                                                | BD Biosciences               |
| pCG10          | pRS415- <i>DBF4</i> <sub>ND109</sub>           | Gabrielse et al., 2006       |
| pCG40          | pAcSG2- <i>DBF4</i> <sub>ND109</sub>           | Miller et al., 2009          |
| pCG44          | pAcSG2- <i>DBF4</i> <sub>ND221</sub>           | Gabrielse et al., 2006       |
| pCG52          | pGBKT7- <i>DBF4</i> <sub>66-227</sub>          | Miller et al., 2009          |
| pCG53          | pYJ204- <i>DBF4</i> <sub>ND65</sub>            | Miller et al., 2009          |
| pCG60          | pCG52 <sub>-ADH1 promoter-Δ(-732)-(-802)</sub> | Miller et al., 2009          |
| pCG63          | pCG60 W202E                                    | This study                   |
| pCG64          | pCG60 W202A                                    | This study                   |
| pCG74          | pYJ204- <i>DBF4</i> <sub>ND109</sub>           | Miller et al., 2009          |
| pCG75          | pYJ204- <i>DBF4</i> <sub>ND221</sub>           | Miller et al., 2009          |
| pCG91          | pAcSG2- <i>DBF4</i> <sub>ND65</sub>            | Gabrielse et al., 2006       |
| pCG101         | pCG60 GA159,160LL                              | This study                   |
| pCG108         | pCG60 F165A                                    | This study                   |
| pCG110         | pCG60 F166A                                    | This study                   |
| pCG146         | pCG60 G159Q                                    | This study                   |
| pCG265         | pGAD-C1- <i>CDC7</i> <sub>1-507</sub>          | Harkins et al., 2009         |
| pCM16          | pAcSG2-3myc- <i>CDC5</i> <sub>65-705</sub>     | Miller et al., 2009          |
| pCM21          | pCG60- <i>DBF4</i> <sub>66-109</sub>           | Miller et al., 2009          |
| pET24a-GST     |                                                | Chen and Weinreich, 2010     |
| pGAD-C1        |                                                | James et al. 1996            |
| pGAD-Cdc5.3    | pGAD-C1- <i>CDC5</i> <sub>421-705</sub>        | Miller et al., 2009          |
| pGAD-YOR.3     | pGAD-C3- <i>MSA169-530</i>                     | This study                   |
| pGBKT7         |                                                | Clontech                     |
| pJK18          | pCG60 T171E                                    | This study                   |
| pJK20          | pCG60 E108A                                    | This study                   |
| pJK22          | pCG60 T171S                                    | This study                   |
| pJK25          | pCG60 V100A                                    | This study                   |
| pJK26          | pCG60 R103A                                    | This study                   |
| pJK27          | pCG60 V104A                                    | This study                   |
| pJK29          | pCG60 P106A                                    | This study                   |
| pJK31          | pCG60 L109A                                    | This study                   |
| pJK33          | pCG60 K107A                                    | This study                   |
| pJK34          | pCG60 T105A E108A                              | This study                   |
| pJK36          | pCG60 E108K                                    | This study                   |
| pJK37          | pCG60 T171A                                    | This study                   |
| pJK39          | pCG60 E101A                                    | This study                   |
| pJK41          | pCG60 P102A                                    | This study                   |

|        |                                   |                          |
|--------|-----------------------------------|--------------------------|
| pJK45  | pYJ204-DBF4 <sub>NΔ81</sub>       | This study               |
| pJK47  | pYJ204-DBF4 <sub>NΔ93</sub>       | This study               |
| pJK48  | pYJ204-DBF4 <sub>NΔ99</sub>       | This study               |
| pJK49  | pCG60 T105S                       | This study               |
| pJK51  | pCG60 K107E                       | This study               |
| pJK53  | pCG60 T131A                       | This study               |
| pJK55  | pCG60 L110A                       | This study               |
| pJK57  | pCG60 E111A                       | This study               |
| pJK59  | pCG60 W112A                       | This study               |
| pJK61  | pCG60 T114A                       | This study               |
| pJK67  | pCG60-DBF4 <sub>Δ94-99</sub>      | This study               |
| pJK76  | pYJ204-DBF4 <sub>NΔ88</sub>       | This study               |
| pJK82  | pCG60 V104L                       | This study               |
| pJK83  | pCG60 L109V                       | This study               |
| pJK85  | pCG60 W112F                       | This study               |
| pJK86  | pCG60 T188A                       | This study               |
| pJK89  | pCG60 T157A                       | This study               |
| pJK91  | pCG60 T163A                       | This study               |
| pJK93  | pCG60 TT168,169AA                 | This study               |
| pJK95  | pCG60 T175A                       | This study               |
| pJK97  | pYJ319 G653E                      | This study               |
| pJK99  | pYJ319 T654A                      | This study               |
| pJK101 | pYJ319 N655A                      | This study               |
| pJK103 | pYJ380 G653E                      | This study               |
| pJK105 | pYJ380 T654A                      | This study               |
| pJK107 | pYJ380 N655A                      | This study               |
| pJK108 | pCG60 Y127A                       | This study               |
| pJK110 | pCG60 Y139A                       | This study               |
| pJK112 | pCG60 Y198A                       | This study               |
| pJK114 | pCG60 Y204A                       | This study               |
| pJK121 | pCG60 Y127S                       | This study               |
| pJK122 | pCG60 Y127T                       | This study               |
| pJK124 | pCG60 I130A                       | This study               |
| pJK125 | pCG60 T171V                       | This study               |
| pJK126 | pCG60 Y204F                       | This study               |
| pJK128 | pCG60 Y127F                       | This study               |
| pJK135 | pGAD-C1-DMA1 <sub>137-302</sub>   | This study               |
| pJK137 | pGAD-C1-DMA2 <sub>246-408</sub>   | This study               |
| pJK149 | pCG60 T95A                        | Chen and Weinreich, 2010 |
| pJK169 | pET24a-GST-RAD53 <sub>2-164</sub> | This study               |
| pJK170 | pET24a-GST-RAD53 <sub>2-175</sub> | This study               |
| pJK171 | pET24a-GST-RAD53 <sub>2-279</sub> | This study               |

|        |                                        |                           |
|--------|----------------------------------------|---------------------------|
| pJK179 | pCG60-DBF4 <sub>ND87</sub> T105A       | This study                |
| pJK181 | pCG60-DBF4 <sub>ND99</sub> T105A       | This study                |
| pJK185 | pCG60-DBF4 <sub>ND93</sub> T105A       | This study                |
| pJK269 | pET24a-GST-RAD53 <sub>2-164</sub> R70A | This study                |
| pJK275 | pGAD-C1-DUN1 <sub>1-160</sub>          | This study                |
| pJK277 | pGAD-C1-FAR10 <sub>61-227</sub>        | This study                |
| pJK279 | pGAD-C1-FHL1 <sub>253-400</sub>        | This study                |
| pJK281 | pGAD-C1-FKH1 <sub>41-185</sub>         | This study                |
| pJK283 | pGAD-C1-MEK1 <sub>1-152</sub>          | This study                |
| pJK285 | pGAD-C1-XRS2 <sub>1-125</sub>          | This study                |
| pJK287 | pGAD-C1-FKH2 <sub>1-254</sub>          | This study                |
| pJK289 | pGAD-C1-PML1 <sub>54-204</sub>         | This study                |
| pJK380 | pET24a-GST-RAD53 <sub>483-821</sub>    | This study                |
| pJK382 | pET24a-GST-RAD53 <sub>549-730</sub>    | This study                |
| pJK410 | pYJ380 R605A                           | This study                |
| pJK420 | pET24a-GST-RAD53 <sub>523-821</sub>    | This study                |
| pJK468 | pCG60 R209E                            | This study                |
| pJK469 | pCG60 K212E                            | This study                |
| pJK487 | pCG60 K206E                            | This study                |
| pJK542 | pRS415-DBF4 <sub>ND94</sub>            | This study                |
| pJK544 | pCG60-DBF4 <sub>ND94</sub>             | This study                |
| pMW1   | pAcPK30-DBF4 <sub>1-704</sub>          | Gabrielse et al., 2006    |
| pMW47  | pAcSG2-HAHIS6-CDC7 <sub>1-507</sub>    | Gabrielse et al., 2006    |
| pMW489 | pRS415-DBF4 <sub>1-704</sub>           | Gabrielse et al., 2006    |
| pMW490 | pRS416-DBF4 <sub>1-704</sub>           | Gabrielse et al., 2006    |
| pMW526 | pRS415-DBF4 <sub>ND65</sub>            | Gabrielse et al., 2006    |
| pRS415 | LEU2 ARS-CEN                           | Sikorski and Hieter, 1989 |
| pRS416 | URA3 ARS-CEN                           | Sikorski and Hieter, 1989 |
| pYJ3   | pCG60-DBF4 <sub>Δ67-81</sub>           | Chen and Weinreich, 2010  |
| pYJ4   | pCG60-DBF4 <sub>Δ67-88</sub>           | Chen and Weinreich, 2010  |
| pYJ5   | pCG60-DBF4 <sub>Δ67-93</sub>           | Chen and Weinreich, 2010  |
| pYJ6   | pCG60-DBF4 <sub>Δ67-99</sub>           | Chen and Weinreich, 2010  |
| pYJ7   | pCG60-DBF4 <sub>Δ67-103</sub>          | Chen and Weinreich, 2010  |
| pYJ8   | pCG60-DBF4 <sub>Δ67-107</sub>          | Chen and Weinreich, 2010  |
| pYJ9   | pCG60-DBF4 <sub>ND109</sub>            | Chen and Weinreich, 2010  |
| pYJ16  | pCG60 S84A                             | Chen and Weinreich, 2010  |
| pYJ30  | pCG60 R83E                             | Chen and Weinreich, 2010  |
| pYJ38  | pCG60-DBF4 <sub>Δ82-88</sub>           | Miller et al., 2009       |
| pYJ74  | pMW489-DBF4 <sub>Δ82-88</sub>          | Chen and Weinreich, 2010  |
| pYJ167 | pCG60 S92A                             | Chen and Weinreich, 2010  |
| pYJ182 | pAcSG2-DBF4 <sub>Δ82-88</sub>          | Chen and Weinreich, 2010  |
| pYJ193 | pMW489-DBF4 <sub>Δ76-109</sub>         | This study                |

|        |                                                |                          |
|--------|------------------------------------------------|--------------------------|
| pYJ195 | pMW489- <i>DBF4</i> <sub>Δ82-109</sub>         | This study               |
| pYJ198 | pMW489- <i>DBF4</i> <sub>Δ66-109</sub>         | This study               |
| pYJ201 | pMW489- <i>DBF4</i> <sub>NΔ65-Δ82-88</sub>     | Chen and Weinreich, 2010 |
| pYJ204 | pGBKT7- <i>DBF4</i> <sub>1-704</sub>           | Miller et al., 2009      |
| pYJ206 | pYJ204- <i>DBF4</i> <sub>Δ82-88</sub>          | Miller et al., 2009      |
| pYJ218 | pMW489- <i>DBF4</i> <sub>Δ89-109</sub>         | This study               |
| pYJ219 | pMW489- <i>DBF4</i> <sub>Δ100-109</sub>        | This study               |
| pYJ222 | pMW489- <i>DBF4</i> <sub>Δ94-109</sub>         | This study               |
| pYJ308 | pGAD-C1- <i>RAD53</i> <sub>1-300</sub>         | This study               |
| pYJ319 | pGAD-C1- <i>RAD53</i> <sub>1-821</sub>         | This study               |
| pYJ326 | pCG60- <i>DBF4</i> <sub>Δ89-93</sub>           | Chen and Weinreich, 2010 |
| pYJ332 | pCG60- <i>DBF4</i> <sub>Δ100-109</sub>         | This study               |
| pYJ336 | pCG60 T105A                                    | This study               |
| pYJ340 | pMW489- <i>DBF4</i> <sub>Δ82-88-Δ100-109</sub> | This study               |
| pYJ355 | pYJ308 R70A                                    | This study               |
| pYJ368 | pCG60- <i>DBF4</i> <sub>66-190</sub>           | This study               |
| pYJ372 | pCG60- <i>DBF4</i> <sub>66-150</sub>           | This study               |
| pYJ380 | pGAD-C1- <i>RAD53</i> <sub>483-821</sub>       | This study               |
| pYJ384 | pYJ319 R70A                                    | This study               |
| pYJ388 | pYJ319 R605A                                   | This study               |
| pYJ392 | pCG60 T105E                                    | This study               |
| pYJ394 | pCG60 T105D                                    | This study               |
| pYJ422 | pAcSG2- <i>DBF4</i> <sub>Δ100-109</sub>        | This study               |
| pYJ424 | pAcSG2- <i>DBF4</i> <sub>Δ82-88-Δ100-109</sub> | This study               |
| pYJ426 | pMW489- <i>DBF4</i> <sub>NΔ65-Δ100-109</sub>   | This study               |
| pYJ428 | pAcSG2- <i>RAD53</i> <sub>1-821</sub>          | This study               |
| pYJ461 | pYJ204 R83E                                    | This study               |
| pYJ462 | pYJ204- <i>DBF4</i> <sub>Δ100-109</sub> R83E   | This study               |
| pYJ464 | pYJ204- <i>DBF4</i> <sub>Δ100-109</sub>        | This study               |
| pYJ466 | pYJ204- <i>DBF4</i> <sub>Δ82-88-Δ100-109</sub> | This study               |
| pYJ489 | pCG60 E101K                                    | This study               |
| pYJ491 | pCG60 R103E                                    | This study               |
| pYJ493 | pCG60 Q113A                                    | This study               |
| pYJ494 | pYJ204- <i>DBF4</i> <sub>NΔ81-Δ100-109</sub>   | This study               |
| pYJ497 | pYJ204- <i>DBF4</i> <sub>NΔ93-Δ100-109</sub>   | This study               |
| pYJ507 | pCG60 E108D                                    | This study               |
| pYJ512 | pCG60 T138A                                    | This study               |
| pYJ535 | pGAD-C1- <i>DBF4</i> <sub>66-227</sub>         | This study               |

**Table S2 Yeast strains used in this study**

| Stain   | Genotype                                                                                                   | Source                     |
|---------|------------------------------------------------------------------------------------------------------------|----------------------------|
| PJ69-4A | <i>MAT a trp1-901 leu2-3, -112 ura3-52 his3-200 gal4Δ gal80Δ LYS2::GAL1-HIS3 GAL2-ADE2 met2::GAL7-lacZ</i> | James et al., 1996         |
| W303-1A | <i>MAT a ade2-1, ura3-1 his3-11, -15 trp1-1 leu2-3, -112 can1-100 rad5-535</i>                             | Thomas and Rothstein, 1989 |
| y57     | W303 <i>MAT a rad53-R70A sml1Δ::HIS3 RAD5</i>                                                              | Pike et al., 2004          |
| y59     | W303 <i>MAT a rad53-K227A sml1Δ::HIS3 RAD5</i>                                                             | Pike et al., 2004          |
| y205    | W303 <i>MAT a rad53-R605A sml1Δ::HIS3 RAD5</i>                                                             | Pike et al., 2004          |
| y1853   | W303 <i>MAT a sml1Δ::URA3 sld3-38A-10his-13MYC::kanMX4</i>                                                 | Zegerman and Diffley, 2010 |
| y2573   | W303 <i>MAT a dbf4Δ::TRP1 his3::PDBF4-dbf4 4A::HIS3 sld3-38A-10his-13MYC::kanMX4</i>                       | Zegerman and Diffley, 2010 |
| M517    | W303 <i>MAT a rad53-1</i>                                                                                  | Gabrielse et al., 2006     |
| M895    | W303 <i>MAT a dbf4Δ::kanMX6 [pMW490; pRS416-DBF4 URA3 ]</i>                                                | Gabrielse et al., 2006     |
| M927    | W303 <i>MAT a dbf4Δ::kanMX4 3HA-CDC7-TRP1 [pMW490; pRS416-DBF4-URA3 ]</i>                                  | Gabrielse et al., 2006     |
| M932    | W303 <i>MAT a dbf4Δ::kanMX4 3HA-CDC7-TRP1 [pMW489; pRS415-DBF4-LEU2 ]</i>                                  | Gabrielse et al., 2006     |
| M936    | W303 <i>MAT a dbf4Δ::kanMX4 3HA-CDC7-TRP1 [pCG10; pRS415-DBF4-NΔ109-LEU2 ]</i>                             | Gabrielse et al., 2006     |
| M2864   | W303 <i>MAT a dbf4Δ::kanMX4 3HA-CDC7-TRP1 [pCG10; pRS415-DBF4-NΔ94-LEU2 ]</i>                              | This study                 |
| M1261   | W303 <i>MAT a dbf4-NΔ109</i>                                                                               | Gabrielse et al., 2006     |
| M1589   | W303 <i>MAT a rad53-1 dbf4Δ::kanMX6 [pMW490; pRS416-DBF4 URA3 ]</i>                                        | Gabrielse et al., 2006     |
| M1800   | W303 <i>MAT1 dbf4-NΔ109-kanMX6</i>                                                                         | Miller et al., 2009        |
| M3581   | W303 <i>MAT a rad53Δ::TRP1 sml1Δ::HIS3 dbf4Δ::kanMX6 [pMW490; pRS416-DBF4 URA3 ]</i>                       | This study                 |
| M3831   | W303 <i>MAT a RAD53-3MYC-TRP1</i>                                                                          | This study                 |
| M3890   | W303 <i>MAT a dbf4-NΔ109-natMX4</i>                                                                        | This study                 |
| M3905   | W303 <i>MAT a dbf4-NΔ109-natMX4 sld3-38A-10his-13MYC::kanMX4</i>                                           | This study                 |
| M3913   | W303 <i>MAT a dbf4-NΔ109-kanMX6 sml1::HIS3</i>                                                             | This study                 |
| M3920   | W303 <i>MAT a RAD53-3MYC-TRP1 dbf4-NΔ109-kanMX6 sml1Δ::HIS3</i>                                            | This study                 |

**Table S3 Peptides used in this study**

| <b>Peptide name</b>  | <b>Peptide sequence</b>          | <b>Length</b> | <b>MW</b> |
|----------------------|----------------------------------|---------------|-----------|
| Biotin-Dbf4 (98-113) | Biotin- KNV EPR VTP KEL LEW Q    | Biotin + 17   | 2192.9    |
| Biotin-pDbf4         | Biotin- KNV EPR V(pT)P KEL LEW Q | Biotin + 17   | 2273.2    |
| Dbf4 (98-113)        | KNV EPR VTP KEL LEW Q            | 17            | 1966.4    |
| pDbf4 (pThr105)      | KNV EPR V(pT)P KEL LEW Q         | 17            | 2047.5    |
| pDbf4-V104A          | KNV EPR A(pT)P KEL LEW Q         | 17            | 2019.8    |
| pDbf4-E108A          | KNV EPR V(pT)P KAL LEW Q         | 17            | 1989.9    |
| pDbf4-E108D          | KNV EPR V(pT)P KDL LEW Q         | 17            | 2032.7    |
| pDbf4-L109A          | KNV EPR V(pT)P KEA LEW Q         | 17            | 2005      |
| Biotin-Rad9          | IMS EVE LTQ ELP EVE              | 15            | 1972.28   |
| Biotin-pRad9         | IMS EVE L(pT)Q ELP EVE           | 15            | 2052.26   |
| pSp72                | EEF LSL AQS (pS)PA GSQ LES RD    | 20            | 2231.3    |

## Supplemental references

- BROOKS, M. A., A. DZIEMBOWSKI, S. QUEVILLON-CHERUEL, V. HENRIOT, C. FAUX *et al.*, 2009 Structure of the yeast Pml1 splicing factor and its integration into the RES complex. *Nucleic Acids Res* **37**: 129-143.
- CHEN, Y. C., and M. WEINREICH, 2010 Dbf4 regulates the Cdc5 Polo-like kinase through a distinct non-canonical binding interaction. *J Biol Chem* **285**: 41244-41254.
- DARIEVA, Z., A. PIC-TAYLOR, J. BOROS, A. SPANOS, M. GEYMONAT *et al.*, 2003 Cell cycle-regulated transcription through the FHA domain of Fkh2p and the coactivator Ndd1p. *Curr Biol* **13**: 1740-1745.
- DUROCHER, D., and S. P. JACKSON, 2002 The FHA domain. *FEBS Lett* **513**: 58-66.
- GABRIELSE, C., C. T. MILLER, K. H. MCCONNELL, A. DEWARD, C. A. FOX *et al.*, 2006 A Dbf4p BRCA1 C-terminal-like domain required for the response to replication fork arrest in budding yeast. *Genetics* **173**: 541-555.
- GOLDSTEIN, A. L., and J. H. MCCUSKER, 1999 Three new dominant drug resistance cassettes for gene disruption in *Saccharomyces cerevisiae*. *Yeast* **15**: 1541-1553.
- HAMMET, A., B. L. PIKE, K. I. MITCHELHILL, T. TEH, B. KOBE *et al.*, 2000 FHA domain boundaries of the dun1p and rad53p cell cycle checkpoint kinases. *FEBS Lett* **471**: 141-146.
- HARKINS, V., C. GABRIELSE, L. HASTE and M. WEINREICH, 2009 Budding yeast Dbf4 sequences required for Cdc7 kinase activation and identification of a functional relationship between the Dbf4 and Rev1 BRCT domains. *Genetics* **183**: 1269-1282.
- JAMES, P., J. HALLADAY and E. A. CRAIG, 1996 Genomic libraries and a host strain designed for highly efficient two-hybrid selection in yeast. *Genetics* **144**: 1425-1436.
- MILLER, C. T., C. GABRIELSE, Y. C. CHEN and M. WEINREICH, 2009 Cdc7p-Dbf4p regulates mitotic exit by inhibiting Polo kinase. *PLoS Genet* **5**: e1000498.
- PALMBOS, P. L., D. WU, J. M. DALEY and T. E. WILSON, 2008 Recruitment of *Saccharomyces cerevisiae* Dnl4-Lif1 complex to a double-strand break requires interactions with Yku80 and the Xrs2 FHA domain. *Genetics* **180**: 1809-1819.
- PIKE, B. L., S. YONGKIETTRAKUL, M. D. TSAI and J. HEIERHORST, 2004 Mdt1, a novel Rad53 FHA1 domain-interacting protein, modulates DNA damage tolerance and G(2)/M cell cycle progression in *Saccharomyces cerevisiae*. *Mol Cell Biol* **24**: 2779-2788.
- THOMAS, B. J., and R. ROTHSTEIN, 1989 Elevated recombination rates in transcriptionally active DNA. *Cell* **56**: 619-630.
- WADE, J. T., D. B. HALL and K. STRUHL, 2004 The transcription factor Ifh1 is a key regulator of yeast ribosomal protein genes. *Nature* **432**: 1054-1058.
- ZEGERMAN, P., and J. F. DIFFLEY, 2010 Checkpoint-dependent inhibition of DNA replication initiation by Sld3 and Dbf4 phosphorylation. *Nature* **467**: 474-478.
