# Supplementary material
Source: PubMed Central journal article supplement (PMC3664849)
Supplement: f2303b7e1803fe49dcab6f5030e0bfbb_genetics.113.149740-2.pdf [file f2303b7e1803fe49dcab6f5030e0bfbb_genetics.113.149740-2.pdf]

**Table S1 Plasmids used in this study**

| Plasmid     | Description                                    | Source                       |
|-------------|------------------------------------------------|------------------------------|
| p4339       | pCRII-TOPO::natRMX4                            | Goldstein and McCusker, 1999 |
| pAcSG2      |                                                | BD Biosciences               |
| pCG10       | pRS415- <i>DBF4</i> <sub>ND109</sub>           | Gabrielse et al., 2006       |
| pCG40       | pAcSG2- <i>DBF4</i> <sub>ND109</sub>           | Miller et al., 2009          |
| pCG44       | pAcSG2- <i>DBF4</i> <sub>ND221</sub>           | Gabrielse et al., 2006       |
| pCG52       | pGBKT7- <i>DBF4</i> <sub>66-227</sub>          | Miller et al., 2009          |
| pCG53       | pYJ204- <i>DBF4</i> <sub>ND65</sub>            | Miller et al., 2009          |
| pCG60       | pCG52 <sub>-ADH1 promoter-Δ(-732)-(-802)</sub> | Miller et al., 2009          |
| pCG63       | pCG60 W202E                                    | This study                   |
| pCG64       | pCG60 W202A                                    | This study                   |
| pCG74       | pYJ204- <i>DBF4</i> <sub>ND109</sub>           | Miller et al., 2009          |
| pCG75       | pYJ204- <i>DBF4</i> <sub>ND221</sub>           | Miller et al., 2009          |
| pCG91       | pAcSG2- <i>DBF4</i> <sub>ND65</sub>            | Gabrielse et al., 2006       |
| pCG101      | pCG60 GA159,160LL                              | This study                   |
| pCG108      | pCG60 F165A                                    | This study                   |
| pCG110      | pCG60 F166A                                    | This study                   |
| pCG146      | pCG60 G159Q                                    | This study                   |
| pCG265      | pGAD-C1- <i>CDC7</i> <sub>1-507</sub>          | Harkins et al., 2009         |
| pCM16       | pAcSG2-3myc- <i>CDC5</i> <sub>65-705</sub>     | Miller et al., 2009          |
| pCM21       | pCG60- <i>DBF4</i> <sub>66-109</sub>           | Miller et al., 2009          |
| pET24a-GST  |                                                | Chen and Weinreich, 2010     |
| pGAD-C1     |                                                | James et al. 1996            |
| pGAD-Cdc5.3 | pGAD-C1- <i>CDC5</i> <sub>421-705</sub>        | Miller et al., 2009          |
| pGAD-YOR.3  | pGAD-C3- <i>MSA169-530</i>                     | This study                   |
| pGBKT7      |                                                | Clontech                     |
| pJK18       | pCG60 T171E                                    | This study                   |
| pJK20       | pCG60 E108A                                    | This study                   |
| pJK22       | pCG60 T171S                                    | This study                   |
| pJK25       | pCG60 V100A                                    | This study                   |
| pJK26       | pCG60 R103A                                    | This study                   |
| pJK27       | pCG60 V104A                                    | This study                   |
| pJK29       | pCG60 P106A                                    | This study                   |
| pJK31       | pCG60 L109A                                    | This study                   |
| pJK33       | pCG60 K107A                                    | This study                   |
| pJK34       | pCG60 T105A E108A                              | This study                   |
| pJK36       | pCG60 E108K                                    | This study                   |
| pJK37       | pCG60 T171A                                    | This study                   |
| pJK39       | pCG60 E101A                                    | This study                   |
| pJK41       | pCG60 P102A                                    | This study                   |

|        |                                   |                          |
|--------|-----------------------------------|--------------------------|
| pJK45  | pYJ204-DBF4 <sub>NΔ81</sub>       | This study               |
| pJK47  | pYJ204-DBF4 <sub>NΔ93</sub>       | This study               |
| pJK48  | pYJ204-DBF4 <sub>NΔ99</sub>       | This study               |
| pJK49  | pCG60 T105S                       | This study               |
| pJK51  | pCG60 K107E                       | This study               |
| pJK53  | pCG60 T131A                       | This study               |
| pJK55  | pCG60 L110A                       | This study               |
| pJK57  | pCG60 E111A                       | This study               |
| pJK59  | pCG60 W112A                       | This study               |
| pJK61  | pCG60 T114A                       | This study               |
| pJK67  | pCG60-DBF4 <sub>Δ94-99</sub>      | This study               |
| pJK76  | pYJ204-DBF4 <sub>NΔ88</sub>       | This study               |
| pJK82  | pCG60 V104L                       | This study               |
| pJK83  | pCG60 L109V                       | This study               |
| pJK85  | pCG60 W112F                       | This study               |
| pJK86  | pCG60 T188A                       | This study               |
| pJK89  | pCG60 T157A                       | This study               |
| pJK91  | pCG60 T163A                       | This study               |
| pJK93  | pCG60 TT168,169AA                 | This study               |
| pJK95  | pCG60 T175A                       | This study               |
| pJK97  | pYJ319 G653E                      | This study               |
| pJK99  | pYJ319 T654A                      | This study               |
| pJK101 | pYJ319 N655A                      | This study               |
| pJK103 | pYJ380 G653E                      | This study               |
| pJK105 | pYJ380 T654A                      | This study               |
| pJK107 | pYJ380 N655A                      | This study               |
| pJK108 | pCG60 Y127A                       | This study               |
| pJK110 | pCG60 Y139A                       | This study               |
| pJK112 | pCG60 Y198A                       | This study               |
| pJK114 | pCG60 Y204A                       | This study               |
| pJK121 | pCG60 Y127S                       | This study               |
| pJK122 | pCG60 Y127T                       | This study               |
| pJK124 | pCG60 I130A                       | This study               |
| pJK125 | pCG60 T171V                       | This study               |
| pJK126 | pCG60 Y204F                       | This study               |
| pJK128 | pCG60 Y127F                       | This study               |
| pJK135 | pGAD-C1-DMA1 <sub>137-302</sub>   | This study               |
| pJK137 | pGAD-C1-DMA2 <sub>246-408</sub>   | This study               |
| pJK149 | pCG60 T95A                        | Chen and Weinreich, 2010 |
| pJK169 | pET24a-GST-RAD53 <sub>2-164</sub> | This study               |
| pJK170 | pET24a-GST-RAD53 <sub>2-175</sub> | This study               |
| pJK171 | pET24a-GST-RAD53 <sub>2-279</sub> | This study               |

|        |                                        |                           |
|--------|----------------------------------------|---------------------------|
| pJK179 | pCG60-DBF4 <sub>ND87</sub> T105A       | This study                |
| pJK181 | pCG60-DBF4 <sub>ND99</sub> T105A       | This study                |
| pJK185 | pCG60-DBF4 <sub>ND93</sub> T105A       | This study                |
| pJK269 | pET24a-GST-RAD53 <sub>2-164</sub> R70A | This study                |
| pJK275 | pGAD-C1-DUN1 <sub>1-160</sub>          | This study                |
| pJK277 | pGAD-C1-FAR10 <sub>61-227</sub>        | This study                |
| pJK279 | pGAD-C1-FHL1 <sub>253-400</sub>        | This study                |
| pJK281 | pGAD-C1-FKH1 <sub>41-185</sub>         | This study                |
| pJK283 | pGAD-C1-MEK1 <sub>1-152</sub>          | This study                |
| pJK285 | pGAD-C1-XRS2 <sub>1-125</sub>          | This study                |
| pJK287 | pGAD-C1-FKH2 <sub>1-254</sub>          | This study                |
| pJK289 | pGAD-C1-PML1 <sub>54-204</sub>         | This study                |
| pJK380 | pET24a-GST-RAD53 <sub>483-821</sub>    | This study                |
| pJK382 | pET24a-GST-RAD53 <sub>549-730</sub>    | This study                |
| pJK410 | pYJ380 R605A                           | This study                |
| pJK420 | pET24a-GST-RAD53 <sub>523-821</sub>    | This study                |
| pJK468 | pCG60 R209E                            | This study                |
| pJK469 | pCG60 K212E                            | This study                |
| pJK487 | pCG60 K206E                            | This study                |
| pJK542 | pRS415-DBF4 <sub>ND94</sub>            | This study                |
| pJK544 | pCG60-DBF4 <sub>ND94</sub>             | This study                |
| pMW1   | pAcPK30-DBF4 <sub>1-704</sub>          | Gabrielse et al., 2006    |
| pMW47  | pAcSG2-HAHIS6-CDC7 <sub>1-507</sub>    | Gabrielse et al., 2006    |
| pMW489 | pRS415-DBF4 <sub>1-704</sub>           | Gabrielse et al., 2006    |
| pMW490 | pRS416-DBF4 <sub>1-704</sub>           | Gabrielse et al., 2006    |
| pMW526 | pRS415-DBF4 <sub>ND65</sub>            | Gabrielse et al., 2006    |
| pRS415 | LEU2 ARS-CEN                           | Sikorski and Hieter, 1989 |
| pRS416 | URA3 ARS-CEN                           | Sikorski and Hieter, 1989 |
| pYJ3   | pCG60-DBF4 <sub>Δ67-81</sub>           | Chen and Weinreich, 2010  |
| pYJ4   | pCG60-DBF4 <sub>Δ67-88</sub>           | Chen and Weinreich, 2010  |
| pYJ5   | pCG60-DBF4 <sub>Δ67-93</sub>           | Chen and Weinreich, 2010  |
| pYJ6   | pCG60-DBF4 <sub>Δ67-99</sub>           | Chen and Weinreich, 2010  |
| pYJ7   | pCG60-DBF4 <sub>Δ67-103</sub>          | Chen and Weinreich, 2010  |
| pYJ8   | pCG60-DBF4 <sub>Δ67-107</sub>          | Chen and Weinreich, 2010  |
| pYJ9   | pCG60-DBF4 <sub>ND109</sub>            | Chen and Weinreich, 2010  |
| pYJ16  | pCG60 S84A                             | Chen and Weinreich, 2010  |
| pYJ30  | pCG60 R83E                             | Chen and Weinreich, 2010  |
| pYJ38  | pCG60-DBF4 <sub>Δ82-88</sub>           | Miller et al., 2009       |
| pYJ74  | pMW489-DBF4 <sub>Δ82-88</sub>          | Chen and Weinreich, 2010  |
| pYJ167 | pCG60 S92A                             | Chen and Weinreich, 2010  |
| pYJ182 | pAcSG2-DBF4 <sub>Δ82-88</sub>          | Chen and Weinreich, 2010  |
| pYJ193 | pMW489-DBF4 <sub>Δ76-109</sub>         | This study                |

|        |                                                |                          |
|--------|------------------------------------------------|--------------------------|
| pYJ195 | pMW489- <i>DBF4</i> <sub>Δ82-109</sub>         | This study               |
| pYJ198 | pMW489- <i>DBF4</i> <sub>Δ66-109</sub>         | This study               |
| pYJ201 | pMW489- <i>DBF4</i> <sub>NΔ65-Δ82-88</sub>     | Chen and Weinreich, 2010 |
| pYJ204 | pGBKT7- <i>DBF4</i> <sub>1-704</sub>           | Miller et al., 2009      |
| pYJ206 | pYJ204- <i>DBF4</i> <sub>Δ82-88</sub>          | Miller et al., 2009      |
| pYJ218 | pMW489- <i>DBF4</i> <sub>Δ89-109</sub>         | This study               |
| pYJ219 | pMW489- <i>DBF4</i> <sub>Δ100-109</sub>        | This study               |
| pYJ222 | pMW489- <i>DBF4</i> <sub>Δ94-109</sub>         | This study               |
| pYJ308 | pGAD-C1- <i>RAD53</i> <sub>1-300</sub>         | This study               |
| pYJ319 | pGAD-C1- <i>RAD53</i> <sub>1-821</sub>         | This study               |
| pYJ326 | pCG60- <i>DBF4</i> <sub>Δ89-93</sub>           | Chen and Weinreich, 2010 |
| pYJ332 | pCG60- <i>DBF4</i> <sub>Δ100-109</sub>         | This study               |
| pYJ336 | pCG60 T105A                                    | This study               |
| pYJ340 | pMW489- <i>DBF4</i> <sub>Δ82-88-Δ100-109</sub> | This study               |
| pYJ355 | pYJ308 R70A                                    | This study               |
| pYJ368 | pCG60- <i>DBF4</i> <sub>66-190</sub>           | This study               |
| pYJ372 | pCG60- <i>DBF4</i> <sub>66-150</sub>           | This study               |
| pYJ380 | pGAD-C1- <i>RAD53</i> <sub>483-821</sub>       | This study               |
| pYJ384 | pYJ319 R70A                                    | This study               |
| pYJ388 | pYJ319 R605A                                   | This study               |
| pYJ392 | pCG60 T105E                                    | This study               |
| pYJ394 | pCG60 T105D                                    | This study               |
| pYJ422 | pAcSG2- <i>DBF4</i> <sub>Δ100-109</sub>        | This study               |
| pYJ424 | pAcSG2- <i>DBF4</i> <sub>Δ82-88-Δ100-109</sub> | This study               |
| pYJ426 | pMW489- <i>DBF4</i> <sub>NΔ65-Δ100-109</sub>   | This study               |
| pYJ428 | pAcSG2- <i>RAD53</i> <sub>1-821</sub>          | This study               |
| pYJ461 | pYJ204 R83E                                    | This study               |
| pYJ462 | pYJ204- <i>DBF4</i> <sub>Δ100-109</sub> R83E   | This study               |
| pYJ464 | pYJ204- <i>DBF4</i> <sub>Δ100-109</sub>        | This study               |
| pYJ466 | pYJ204- <i>DBF4</i> <sub>Δ82-88-Δ100-109</sub> | This study               |
| pYJ489 | pCG60 E101K                                    | This study               |
| pYJ491 | pCG60 R103E                                    | This study               |
| pYJ493 | pCG60 Q113A                                    | This study               |
| pYJ494 | pYJ204- <i>DBF4</i> <sub>NΔ81-Δ100-109</sub>   | This study               |
| pYJ497 | pYJ204- <i>DBF4</i> <sub>NΔ93-Δ100-109</sub>   | This study               |
| pYJ507 | pCG60 E108D                                    | This study               |
| pYJ512 | pCG60 T138A                                    | This study               |
| pYJ535 | pGAD-C1- <i>DBF4</i> <sub>66-227</sub>         | This study               |
